# Supplementary material for: Chronic Alcohol Exposure Promotes Cancer Stemness and Glycolysis in Oral/Oropharyngeal Squamous Cell Carcinoma Cell Lines by Activating NFAT Signaling
Source: MDPI journal article supplement (doi:10.3390/ijms23179779), 2022-08-29

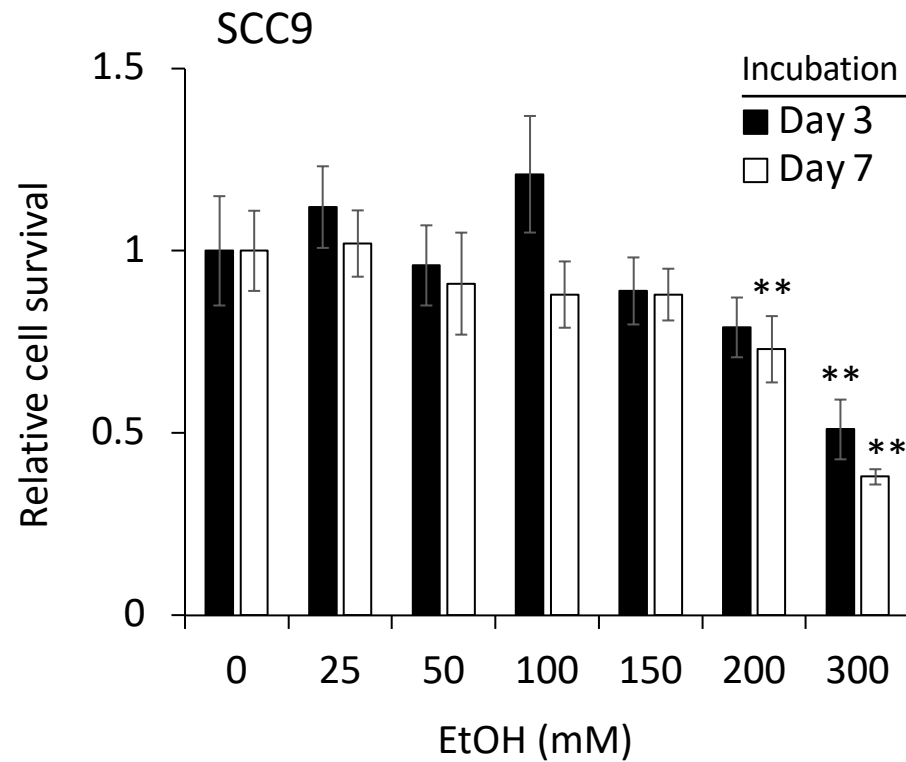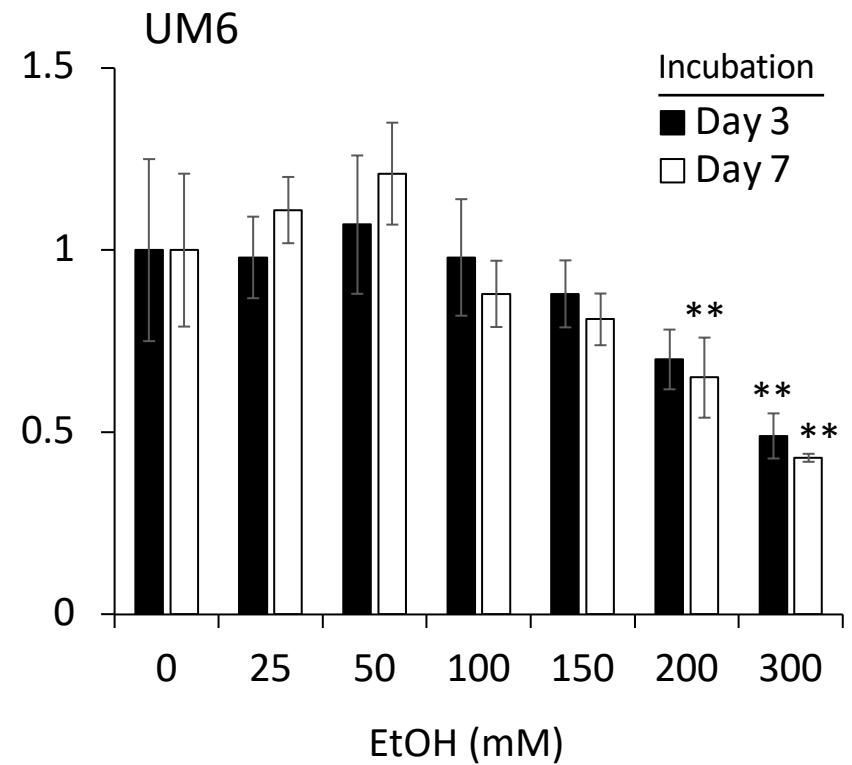

**A**

Relative glucose uptake

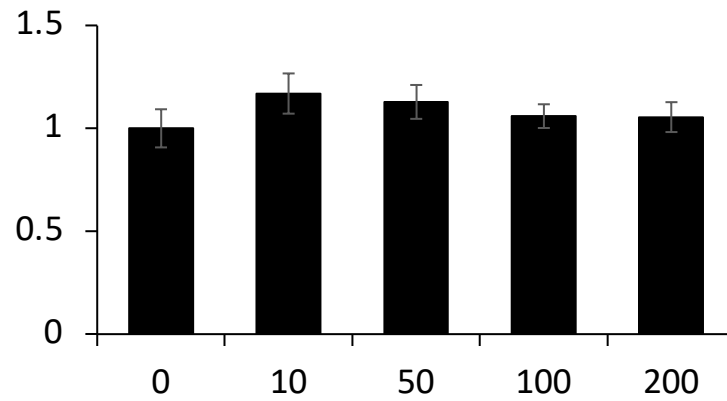

EtOH (mM) for 24 hr

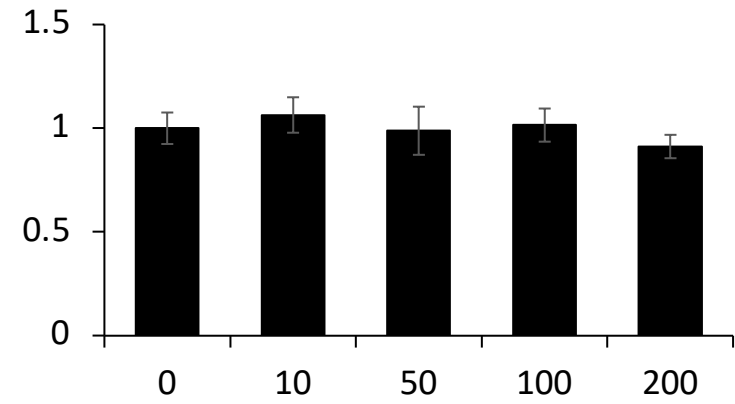

EtOH (mM) for 48 hr

**B**

Relative lactate secretion

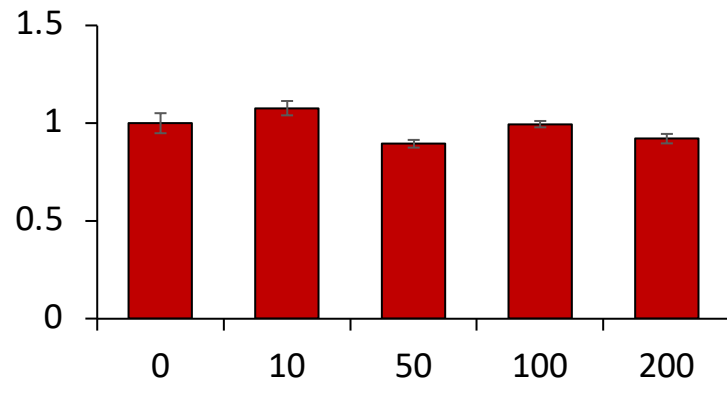

EtOH (mM) for 24 hr

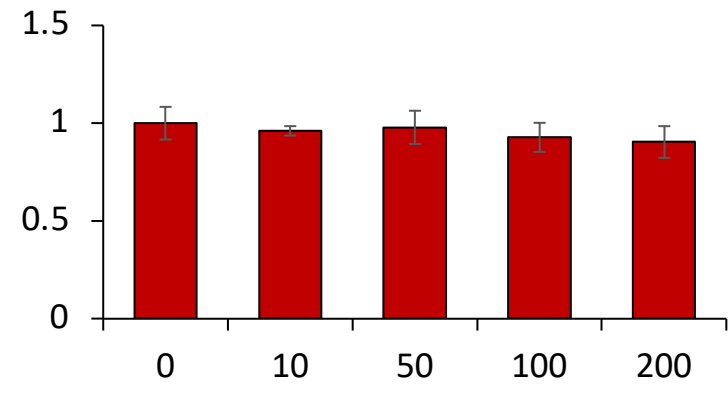

EtOH (mM) for 48 hr

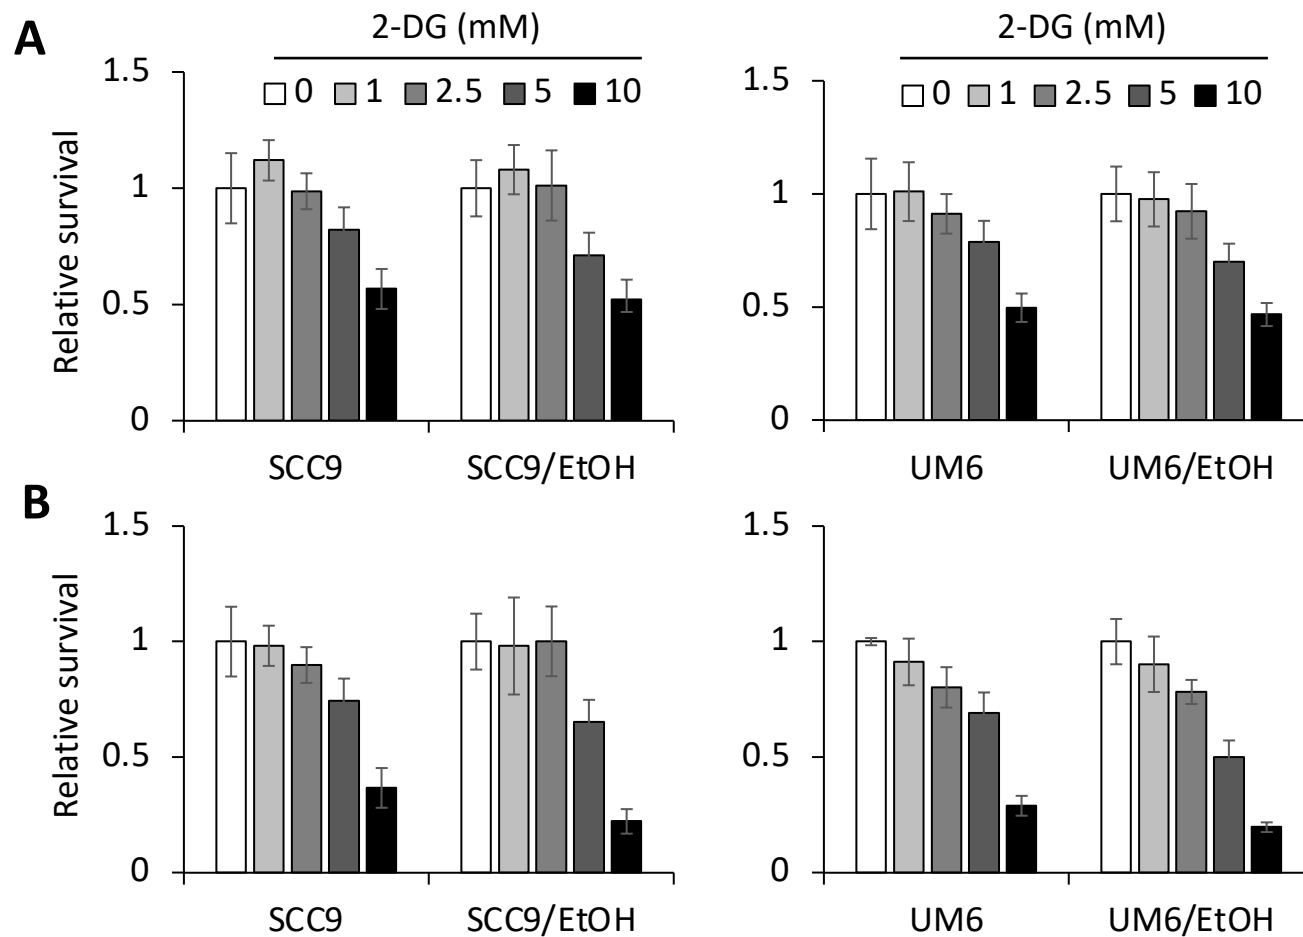

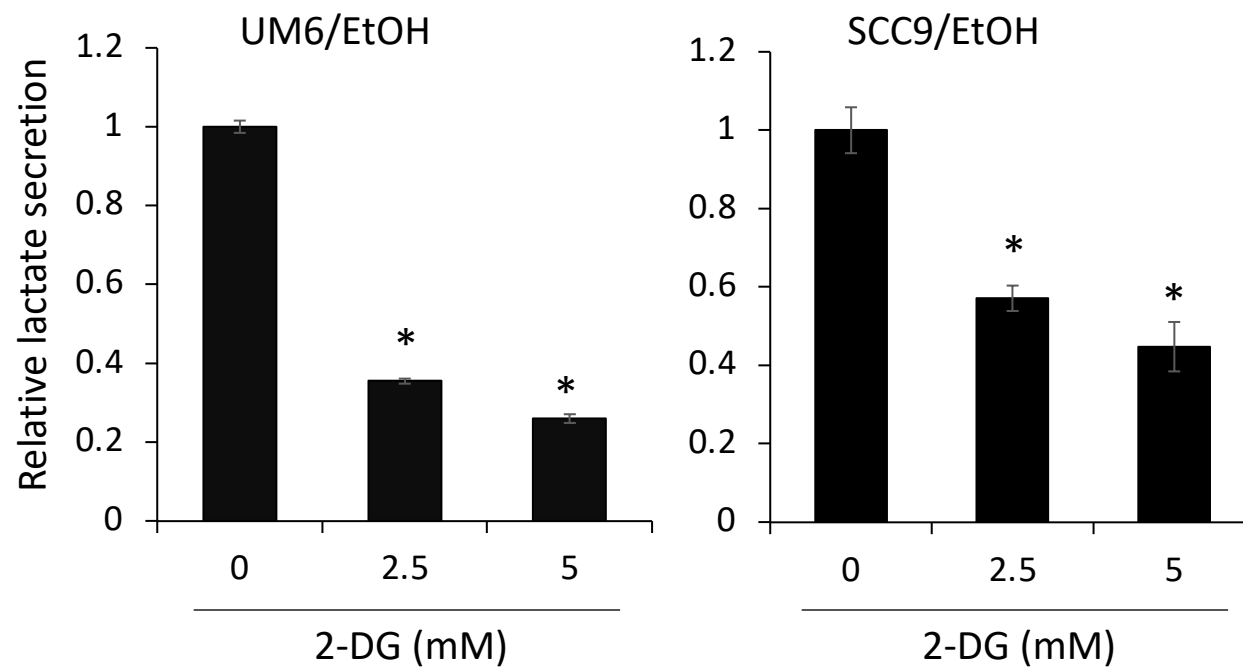

**A**

SCC9/EtOH CTLi

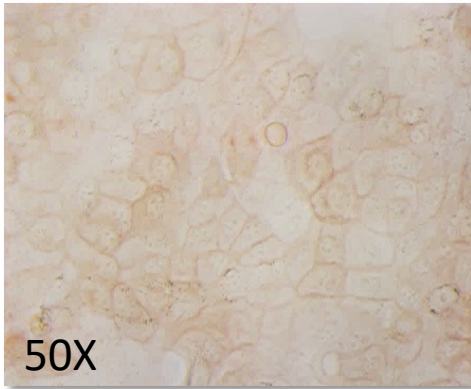

SCC9/EtOH NFATc2i

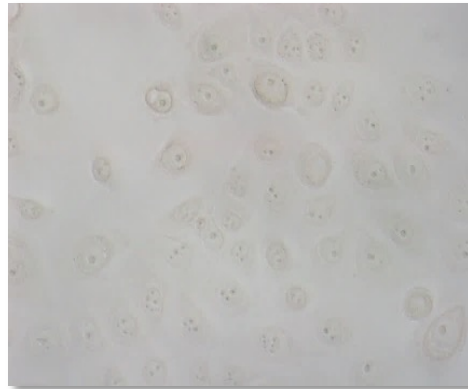

**B**

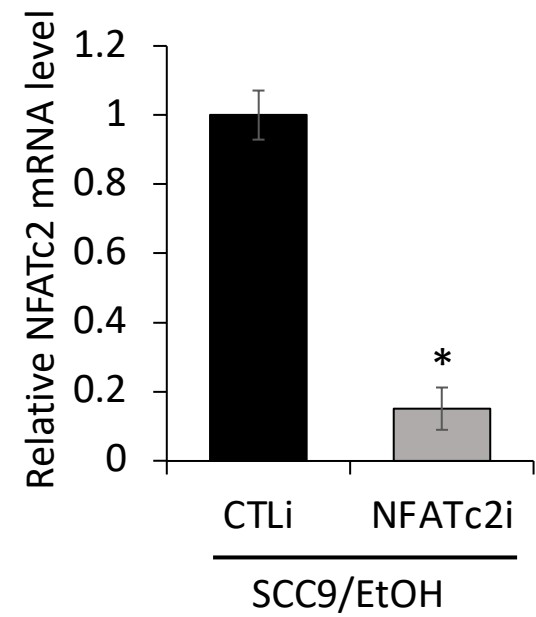

**A**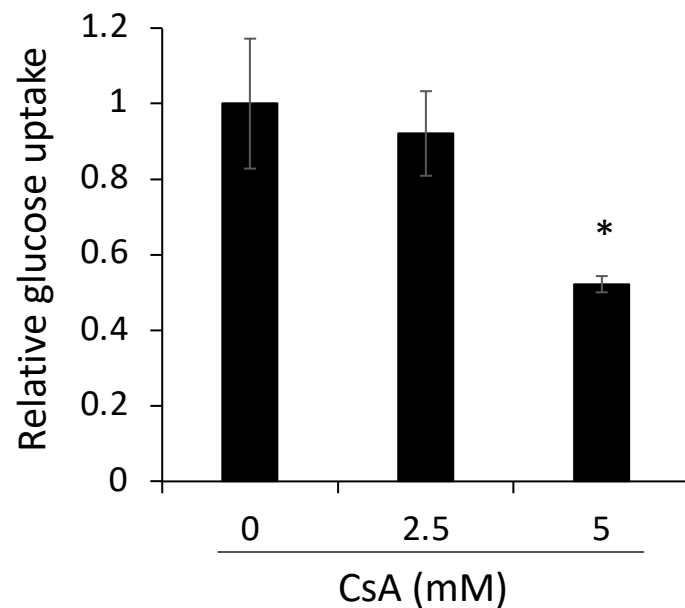**B**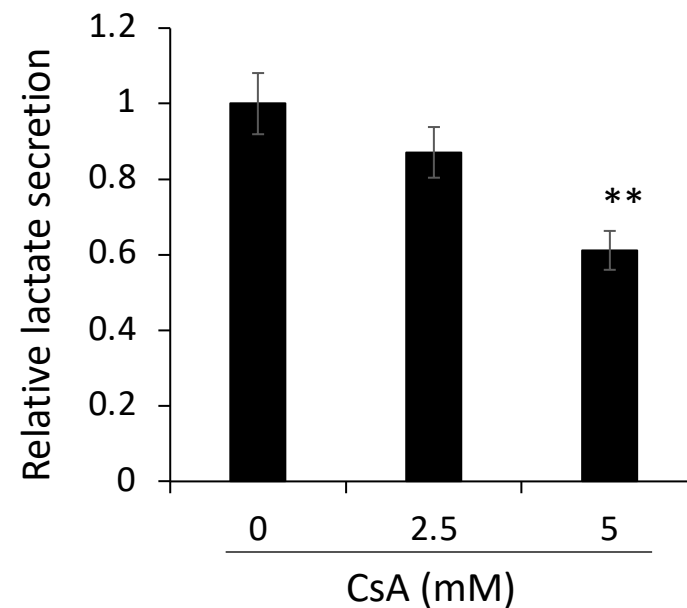**C**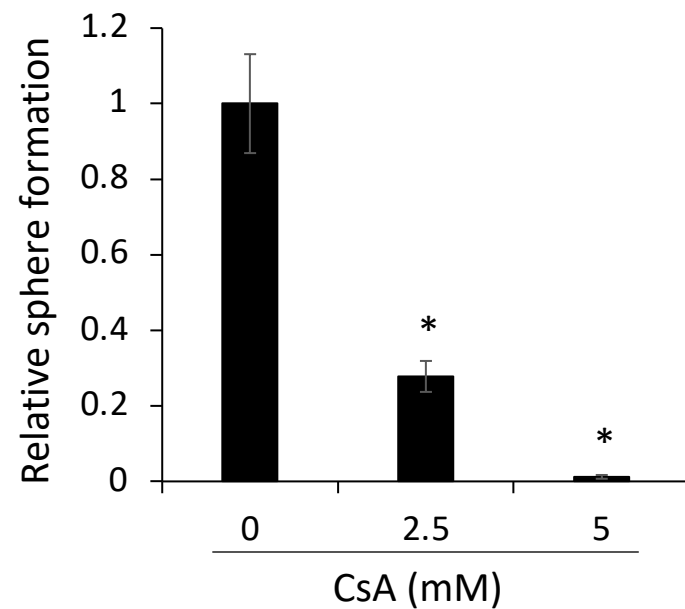**D**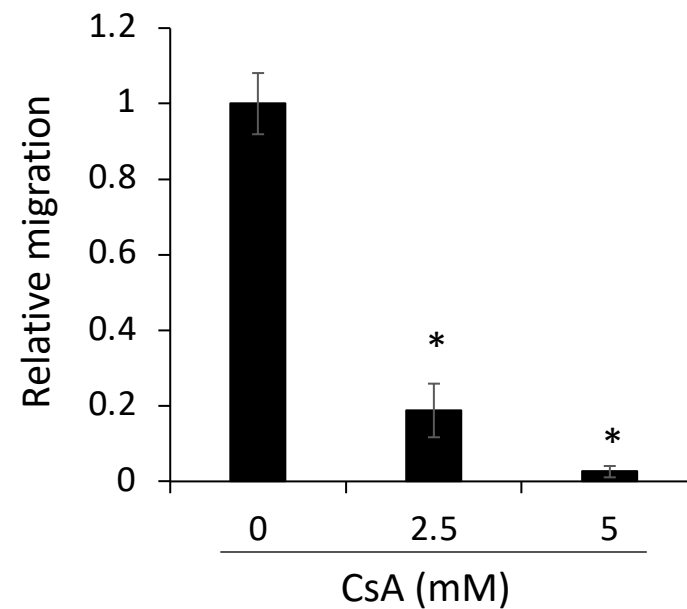

Supplement: s1 [file s1]
